# Supplementary material
Source: PubMed Central journal article supplement (PMC2391190)

D

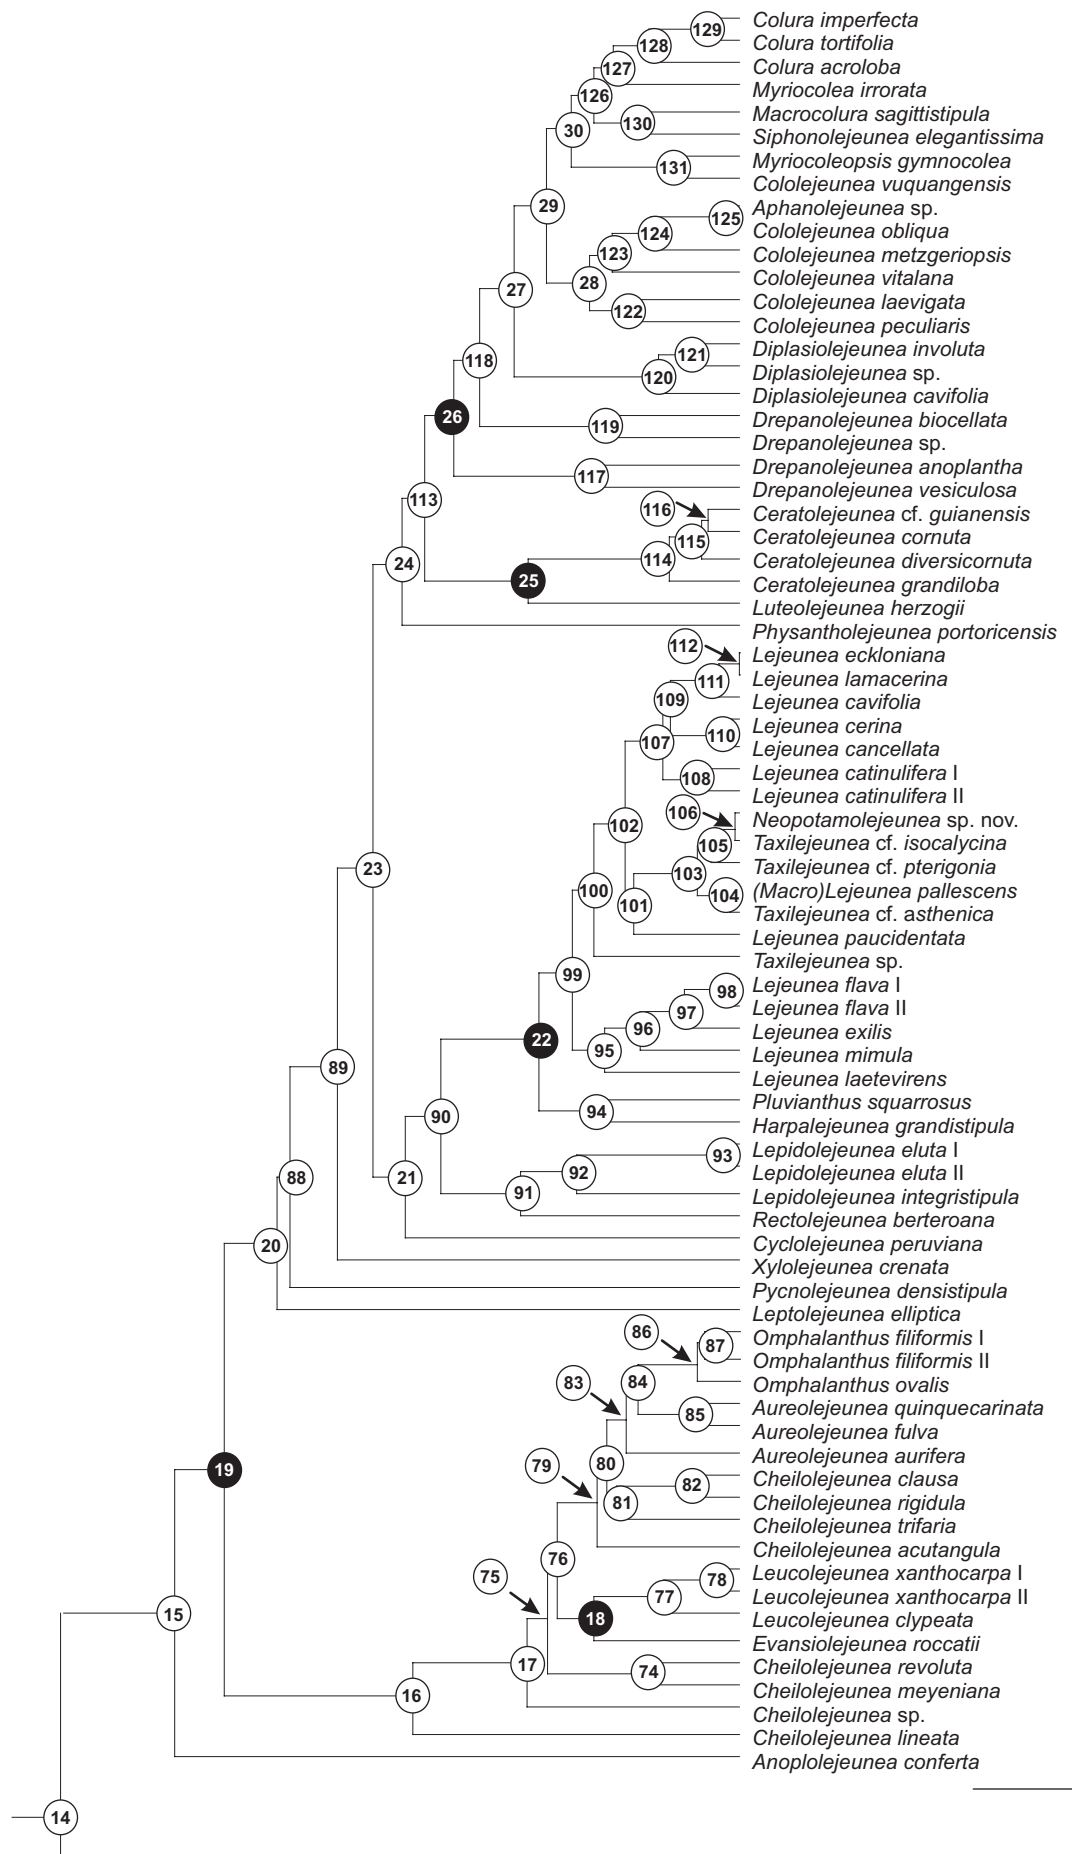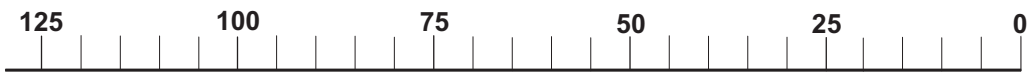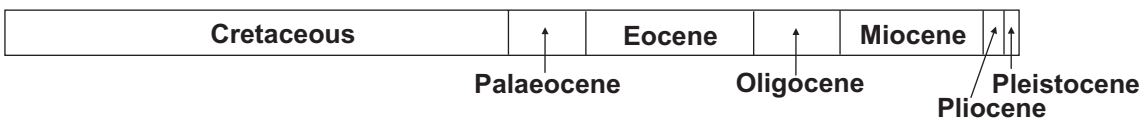

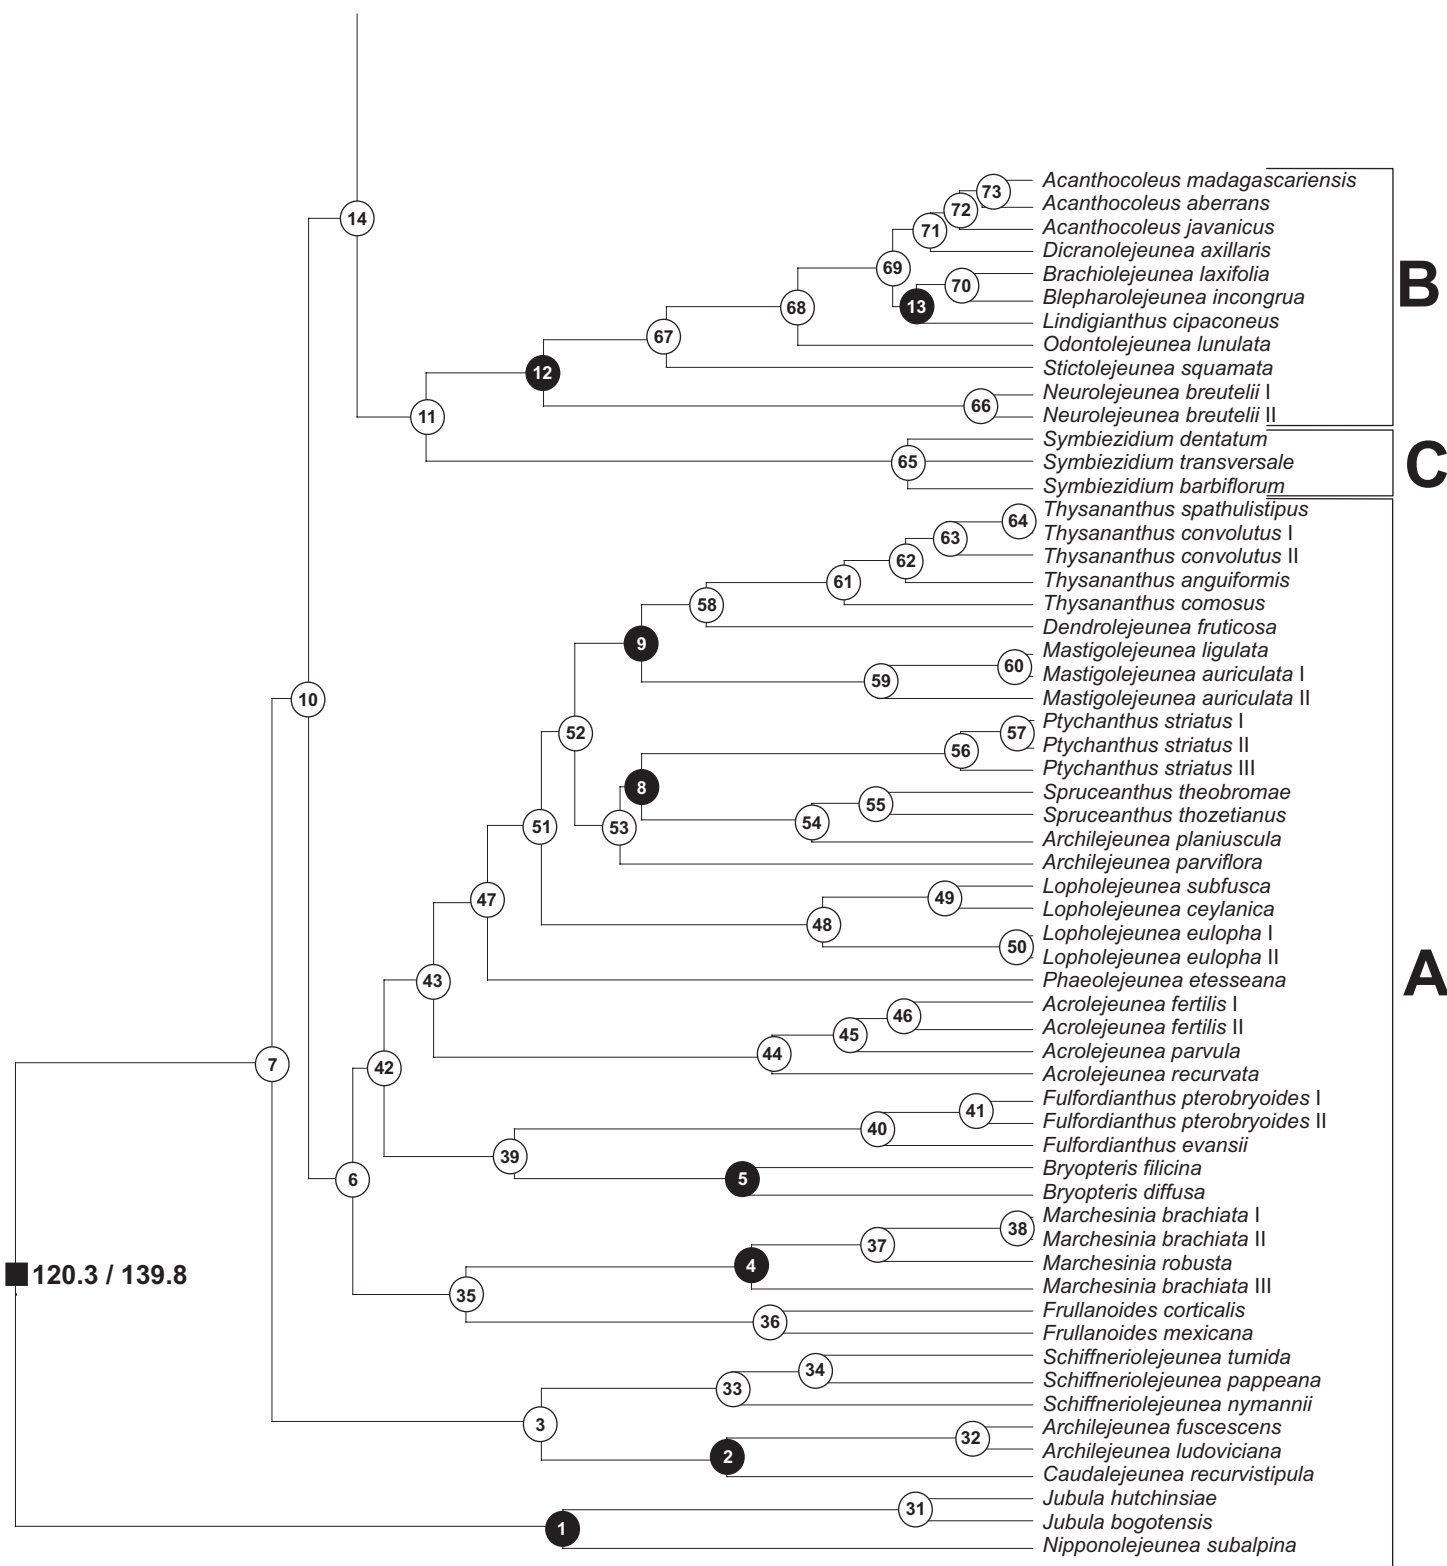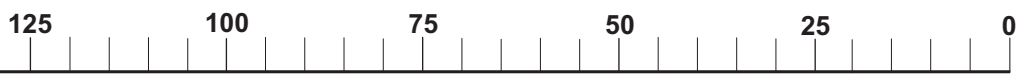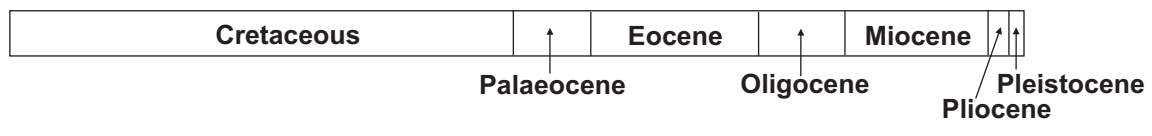

Supplement: rsbl20070287s24.pdf [file rsbl20070287s24.pdf]
